# Supplementary material for: A robust conglomerate structure type in salts of cationic organopalladium complexes and non-coordinating anions
Source: Royal Society of Chemistry journal article supplement (doi:10.1039/b712641g), 2007-10-15
Supplement: b712641g.pdf [file b712641g.pdf]

---

## A robust conglomerate structure type in salts of cationic organopalladium complexes and non-coordinating anions

---

Irmgard Kalf, Ruimin Wang and Ulli Englert

Lattice energy minimizations for *rac-2e* vs. *R-2e* and *rac-3* vs. *R-3*.

a) **Van-der-Waals interactions** were modeled with a Buckingham potential of the type

$$E_{vdW} = \frac{1}{2} \sum_i \sum_j (-Ar_{ij}^{-6} + Be^{-Cr_{ij}})$$

Van-der-Waals parameters in lattice energy minimizations for *rac-2e* vs. *R-2e* and *rac-3* vs. *R-3*.

| atom type 1 | atom type 2 | $A_{ij}$                                 | $B_{ij}$                | $C_{ij}$           |
|-------------|-------------|------------------------------------------|-------------------------|--------------------|
|             |             | [kJ·mol <sup>-1</sup> ·Å <sup>-6</sup> ] | [kJ·mol <sup>-1</sup> ] | [Å <sup>-1</sup> ] |
| H           | H           | 144.2                                    | 11104                   | 3.74               |
| H           | C           | 523                                      | 36677                   | 3.67               |
| C           | C           | 2377                                     | 349908                  | 3.60               |
| N           | N           | 1800                                     | 361000                  | 3.90               |
| O           | O           | 1242.6                                   | 372203                  | 4.18               |
| F           | F           | 858.2                                    | 425692                  | 4.50               |
| P           | P           | 6840.2                                   | 466827                  | 3.29               |
| S           | S           | 6840.2                                   | 466827                  | 3.29               |
| Pd          | Pd          | 6463                                     | 1804000                 | 4.00               |

For all other mixed interactions the combining rules were used:

$$A_{12} = \sqrt{A_{11} \cdot A_{22}}$$

$$B_{12} = \sqrt{B_{11} \cdot B_{22}}$$

$$C_{12} = \frac{(C_{11} + C_{22})}{2}$$

b) **Hydrogen bond interactions** were modeled by additional exponential functions.

$$\text{N-H}\cdots\text{O} \quad E = -8184.5 \cdot \exp(-2.9 \cdot r_{ij})$$

$$\text{N-H}\cdots\text{F} \quad E = -9100 \cdot \exp(-3.18 \cdot r_{ij})$$

with  $E$  in kJ·mol<sup>-1</sup> and hydrogen-acceptor distances  $r_{ij}$  in Å.

c) Results of lattice energy minimizations for *rac-2e* vs. *R-2e*

|                                                  | <i>rac-2e</i> |           | <i>R-2e</i>  |           |
|--------------------------------------------------|---------------|-----------|--------------|-----------|
|                                                  | experimental  | minimized | experimental | minimized |
| space group                                      | $P2_1/c$      | $P2_1/c$  | $P2_1$       | $P2_1$    |
| $T$ (K) experiment <sup>a</sup>                  | 293           |           | 130          |           |
| $a$ (Å)                                          | 7.724(3)      | 7.888     | 7.5980(5)    | 7.575     |
| $b$ (Å)                                          | 20.015(8)     | 18.874    | 20.5971(14)  | 20.546    |
| $c$ (Å)                                          | 14.106(6)     | 13.649    | 13.8222(9)   | 13.707    |
| $\beta$ (°)                                      | 102.012(9)    | 104.95    | 105.038(2)   | 104.63    |
| $V$ (Å <sup>3</sup> )                            | 2133.0(15)    | 1963.2    | 2089.1(2)    | 2064.2    |
| $E$ total (kJ·mol <sup>-1</sup> ) <sup>b</sup>   |               | -183.4    |              | -166.1    |
| $E$ H bonds (kJ·mol <sup>-1</sup> ) <sup>c</sup> |               | -34.3     |              | -24.4     |

d) Results of lattice energy minimizations for *rac-3* vs. *R-3*.

|                                                  | <i>rac-3</i> |           | <i>R-3</i>   |           |
|--------------------------------------------------|--------------|-----------|--------------|-----------|
|                                                  | experimental | minimized | experimental | minimized |
| space group                                      | $P2_1/n$     |           | $P2_1$       |           |
| $T$ (K) experiment <sup>a</sup>                  | 110          |           | 130          |           |
| $a$ (Å)                                          | 11.6744(17)  | 12.199    | 11.6452(13)  | 11.782    |
| $b$ (Å)                                          | 14.108(2)    | 13.636    | 14.3172(13)  | 14.291    |
| $c$ (Å)                                          | 11.9538(18)  | 11.965    | 12.0277(13)  | 11.791    |
| $\beta$ (°)                                      | 96.137(4)    | 102.51    | 96.018(4)    | 98.04     |
| $V$ (Å <sup>3</sup> )                            | 1957.5(5)    | 1943.0    | 1994.3(4)    | 1965.8    |
| $E$ total (kJ·mol <sup>-1</sup> ) <sup>b</sup>   |              | -167.4    |              | -148.3    |
| $E$ H bonds (kJ·mol <sup>-1</sup> ) <sup>c</sup> |              | -18.6     |              | -20.0     |

<sup>a</sup> The unit cell volumes after minimization are usually lower than the experimental values because the latter refer to finite temperatures  $\gg 0$  K. The difference is therefore most marked for *rac-2e*.

<sup>b</sup> Lattice energy/ion pair, taking into account both van der Waals interactions and H bonds.

<sup>c</sup> Hydrogen bond energy/ion pair.
